# Supplementary material for: Pulse electromagnetic fields enhance the repair of rabbit articular cartilage defects with magnetic nano-hydrogel
Source: Royal Society of Chemistry journal article supplement (doi:10.1039/c9ra07874f), 2020-01-01
Supplement: c9ra07874f1.pdf [file c9ra07874f1.pdf]

## 1 Supplemental material

2 Fig. S1: A: Magnetic gelatin/ $\beta$ -CD/Fe<sub>3</sub>O<sub>4</sub> hydrogel (diameter 10 mm, height 5 mm);  
3 B, C: pressure test procedure of magnetic gelatin/ $\beta$ -CD/Fe<sub>3</sub>O<sub>4</sub> hydrogel, loading rate  
4 5.00 mm/min; D: Deformation state after the pressure test of the magnetic gelatin/ $\beta$ -  
5 CD/Fe<sub>3</sub>O<sub>4</sub> hydrogel; E: ordinary gelatin/ $\beta$ -CD hydrogel (diameter 10 mm, height 5  
6 mm); F, G: ordinary gelatin/ $\beta$ -CD water. The pressure test of the gel, the loading rate  
7 was 5.00 mm/min; H: The deformation state after the pressure test of the ordinary  
8 gelatin/ $\beta$ -CD hydrogel.

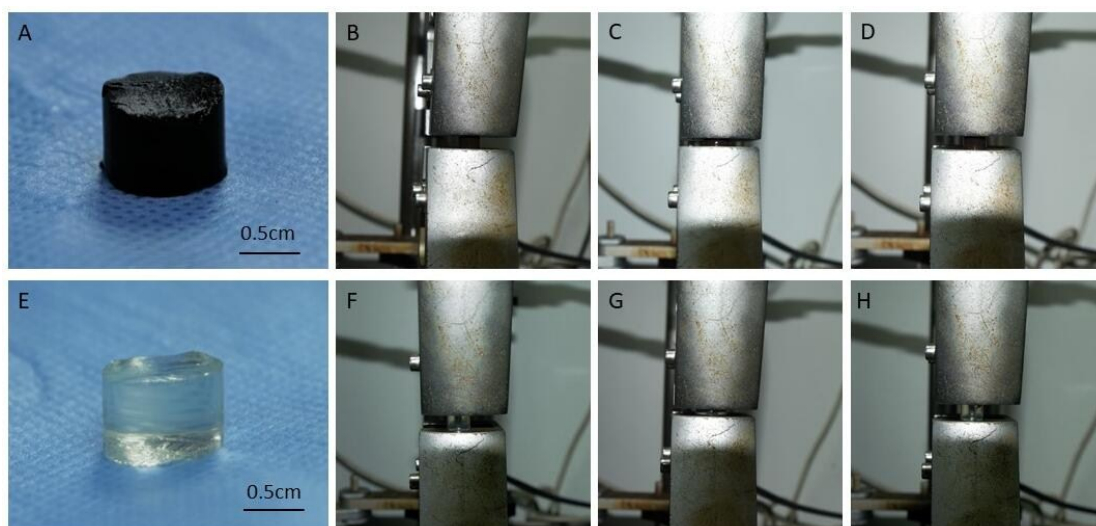

9  
10  
11  
12  
13  
14  
15  
16  
17  
18  
19

20 Fig. S2: A: Magnetic nanocomposite hydrogel; B: Still flowing at 30 s, gradually  
21 gelatinized; C: Tilt test conducted every 30 s to test its fluidity, and it stops flowing  
22 after 200 s, at which time it has already gelatinized; D: Ordinary hydrogel; E: At 30 s,  
23 it can still flow and gradually becomes glue; F: Tilt test conducted every 30 s to test  
24 its fluidity, and it stops flowing after 200 s, at which time it has become glue.

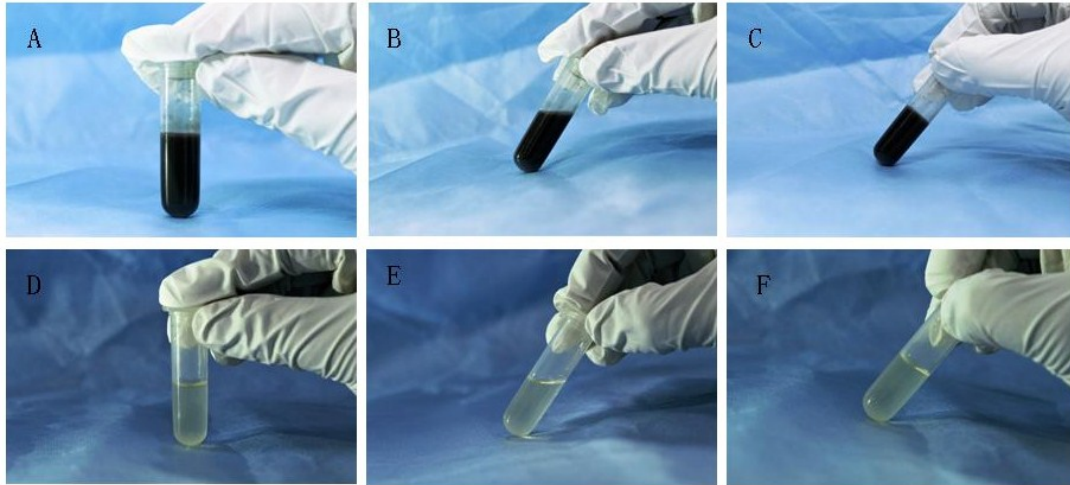

25  
26  
27  
28  
29  
30  
31  
32  
33  
34  
35  
36  
37  
38

39 Fig. S3: A: BMSCs; B: BMSCs induced chondrocytes, and Toluidine blue staining  
40 confirmed that the rabbit BMSCs could be differentiated into chondrocytes, C:  
41 BMSCs; D: BMSCs induced adipocytes, and oil red O-staining confirmed that rabbit  
42 BMSCs induced differentiation into adipocytes.

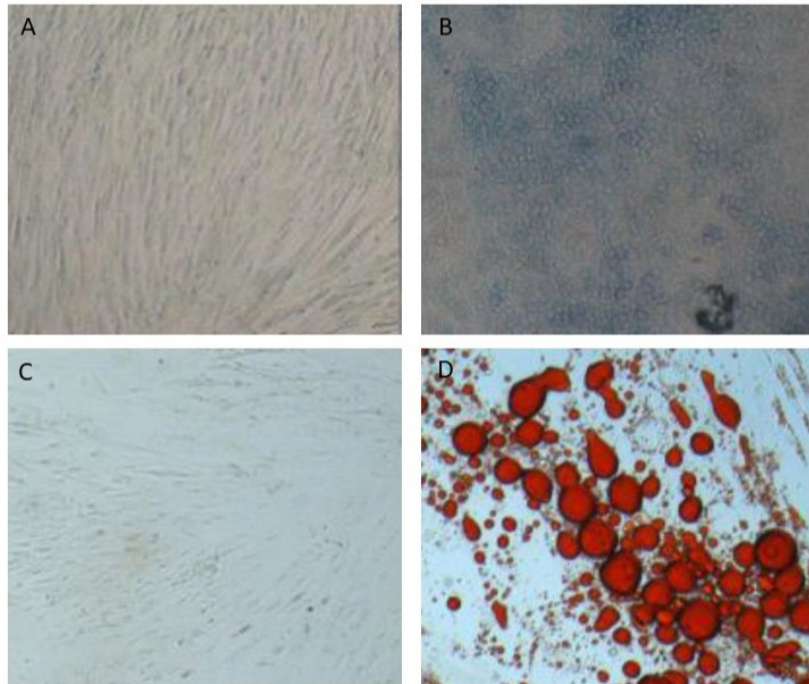

43

44

45

46

47

48

49

50

51

52

53

54

55 Fig. S4: A: Rabbit knee cartilage; B: Cartilage defect; C: Cartilage defect (diameter 5  
56 mm, depth 5 mm, belonging to a large, deep area of defect); and D: Each group of  
57 samples was implanted into the defect site.

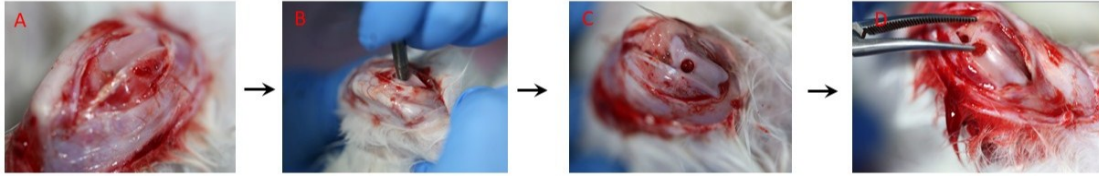

58

59

60

61

62

63

64

65

66

67

68

69

70

71

72

73

74

75

76

77

78 **Table S1. International Cartilage Repair Society macroscopic evaluation of cartilage**  
 79 **repair**

| <b>Categories</b>                                                                            | <b>Scores</b> |
|----------------------------------------------------------------------------------------------|---------------|
| <b>Degree of defect repair</b>                                                               |               |
| In level with surrounding cartilage                                                          | 4             |
| 75% repair of defect depth                                                                   | 3             |
| 50% repair of defect depth                                                                   | 2             |
| 25% repair of defect depth                                                                   | 1             |
| No repair of defect depth                                                                    | 0             |
| <b>Integration to border zone</b>                                                            |               |
| Complete integration with surrounding cartilage                                              | 4             |
| Demarcating border-1 mm                                                                      | 3             |
| Three-quarters of graft integrated, one-quarter with a notable border-1 mm in width          | 2             |
| One-half of graft integrated with surrounding cartilage, one-half with a notable border-1 mm | 1             |
| From no contact to one-quarter of graft integrated with surrounding cartilage                | 0             |
| <b>Macroscopic appearance</b>                                                                |               |
| Intact smooth surface                                                                        | 4             |
| Fibrillated surface                                                                          | 3             |
| Small, scattered fissures or cracks                                                          | 2             |
| Several small or few large fissures                                                          | 1             |
| Total degeneration of grafted area                                                           | 0             |
| <b>Overall repair assessment</b>                                                             |               |
| Grade I: normal                                                                              | 12            |
| Grade II: nearly normal                                                                      | 8-11          |
| Grade III: abnormal                                                                          | 4-7           |
| Grade IV: severely abnormal                                                                  | 1-3           |

80  
 81  
 82  
 83  
 84  
 85  
 86  
 87  
 88  
 89  
 90  
 91  
 92  
 93  
 94

95 **Table S2. The ICRS Visual Histological Assessment Scale**

| <b>Features</b>                                       | <b>Scores</b> |
|-------------------------------------------------------|---------------|
| <b>Surface</b>                                        |               |
| Smooth/continuous                                     | 3             |
| Discontinuities/irregularities                        | 0             |
| <b>Matrix</b>                                         |               |
| Hyaline                                               | 3             |
| Mixture: hyaline/fibrocartilage                       | 2             |
| Fibrocartilage                                        | 1             |
| Fibrous tissue                                        | 0             |
| <b>Cell distribution</b>                              |               |
| Columnar                                              | 3             |
| Mixed/columnar-clusters                               | 2             |
| Clusters                                              | 1             |
| Individual cells/disorganized                         | 0             |
| <b>Cell population viability</b>                      |               |
| Predominantly viable                                  | 2             |
| Partially viable                                      | 1             |
| <10% viable                                           | 0             |
| <b>Subchondral bone</b>                               |               |
| Normal                                                | 3             |
| Increased remodeling                                  | 2             |
| Bone necrosis/granulation tissue                      | 1             |
| Detached/fracture/callus at base                      | 0             |
| <b>Cartilage mineralization (calcified cartilage)</b> |               |
| Normal                                                | 2             |
| Abnormal/inappropriate location                       | 0             |
| <b>Toluidine blue stain</b>                           |               |
| Normal                                                | 4             |
| Slight reduction                                      | 3             |
| Moderate reduction                                    | 2             |
| Severe reduction                                      | 1             |
| No staining                                           | 0             |
| <b>Percent toluidine blue in defect</b>               |               |
| 75–100%                                               | 4             |
| 50–75%                                                | 3             |
| 25–50%                                                | 2             |
| 0–25%                                                 | 1             |
| No toluidine blue staining                            | 0             |
|                                                       | Max 24        |
